1  
2  
3  
4  
5  
6  
7  
8  
9  
10  
11  
12  
13  
14  
15  
16  
17  
18  
19  
20  
21  
22

# **The dynamics of preferential host switching: host phylogeny as a key predictor of parasite prevalence and distribution**

Jan Engelstädter\* & Nicole Z. Fortuna

School of Biological Sciences, The University of Queensland, Brisbane, Australia

\* Corresponding author.

Address: The University of Queensland, School of Biological Sciences, Brisbane,

QLD 4072, Australia

Phone: +61 7 336 57959

Email: [j.engelstaedter@uq.edu.au](mailto:j.engelstaedter@uq.edu.au)

Keywords: host-shifts, host switches, codiversification, host-parasite coevolution, emerging diseases, mathematical model, host range

Authorship: JE conceived and designed the project, JE and NZF implemented the model, analysed the simulation results and wrote the paper.

## 23 **Abstract**

24 New parasites commonly arise through host-shifts, where parasites from one host  
25 species jump to and become established in a new host species. There is much  
26 evidence that the probability of host-shifts decreases with increasing phylogenetic  
27 distance between donor and recipient hosts, but the consequences of such  
28 preferential host switching remain little explored. We develop a mathematical model  
29 to investigate the dynamics of parasite host-shifts in the presence of this  
30 phylogenetic distance effect. Host trees evolve under a stochastic birth-death  
31 process and parasites co-evolve concurrently on those trees, undergoing host-shifts,  
32 co-speciation and extinction. Our model indicates that host trees have a major  
33 influence on these dynamics. This applies both to individual trees that evolved under  
34 the same stochastic process and to sets of trees that evolved with different  
35 macroevolutionary parameters. We predict that trees consisting of a few large clades  
36 of host species and those with fast species turnover should harbour more parasites  
37 than trees with many small clades and those that diversify more slowly. Within trees,  
38 large clades should exhibit a higher infection frequency than small clades. We  
39 discuss our results in the light of recent cophylogenetic studies in a wide range of  
40 host-parasite systems, including the intracellular bacterium *Wolbachia*.

## 41 Introduction

42 Parasitism represents one of the most successful modes of life. Humans harbour  
43 more than 1400 species of parasites (Taylor *et al.* 2001), which extrapolates to an  
44 enormous total number of parasites across all host species. Where do all these  
45 parasites come from? Some parasites may have always been around: they may  
46 have been inherited from the ancestor of their present host species and maintained  
47 ever since. This scenario of ‘cospeciation’ has been described in some mutualists  
48 but appears to be rare in parasites (de Vienne *et al.* 2013). Other parasites may  
49 originate from organisms that are either free-living or non-parasitic symbionts (Crook  
50 2014; Hurst 2016). Finally, some parasites may have switched from another host  
51 species to their present-day host. Such host-shifts have been widely documented.  
52 The majority of human pathogens originate through host-shifts, including HIV and  
53 malaria (Wolfe *et al.* 2007). Host-shifts are also the predominant cause of new host-  
54 parasite associations for *Wolbachia* endosymbionts and their arthropod hosts  
55 (Werren *et al.* 1995), rabies viruses in bats (Streicker *et al.* 2010), lentiviruses in  
56 primates (Sharp *et al.* 2000), oomycetes in Asteraceae (Choi & Thines 2015), and  
57 malaria in birds (Ricklefs *et al.* 2014).

58 Establishing a sustainable relationship with a new host species represents a  
59 considerable challenge to parasites. While many opportunities for host-switches  
60 exist, most attempts are unsuccessful and lead to mere ‘spill-over’ infections, i.e.  
61 infections with no or short transmission chains (Taylor *et al.* 2001; Wood *et al.* 2012).  
62 Examples of such spillovers in humans include rabies, Hendra, and Ebola viruses.  
63 Successful host-shifts are difficult because the parasite must be able to enter,  
64 proliferate within, and transmit efficiently between, members of a new host species

65 that they are not adapted to. These requirements mean that all else being equal,  
66 shifts to new hosts that are similar to the original host with respect to relevant traits  
67 should be easier than shifts to hosts that are very different from the original one.  
68 Given that this similarity will be positively correlated with phylogenetic relatedness  
69 between host species, we can predict that host-shifts to closely related new hosts  
70 should be more common than host-shifts to distantly related hosts (Charleston &  
71 Robertson 2002; Engelstädter & Hurst 2006; Longdon *et al.* 2014). We will refer to  
72 this expectation as the ‘phylogenetic distance effect’.

73 There are two lines of evidence for the phylogenetic distance effect. First, a number  
74 of transfection experiments have been conducted in which parasites from one  
75 species were exposed to a range of hosts from different species. For example,  
76 Longdon *et al.* (2011) demonstrated that for three sigma viruses endogenous to  
77 different species of *Drosophila*, phylogenetic distance between the donor and  
78 recipient host species was negatively correlated with the viruses’ ability to replicate  
79 within the recipient host. Similarly, for male-killing *Spiroplasma* bacteria in ladybird  
80 beetles, Tinsley & Majerus (2007) reported that the more distantly related the new  
81 host was to the original host, the lower the parasites’ ability to kill male host offspring  
82 (the phenotype driving the infection). Other systems in which experimental evidence  
83 for the phylogenetic distance effect has been obtained include nematodes infecting  
84 *Drosophila* flies (Perlman & Jaenike 2003), feather-lice infecting pigeons and doves  
85 (Clayton *et al.* 2003), and plant-fungal systems (Gilbert & Webb 2007; de Vienne *et*  
86 *al.* 2009). Strong evidence for the phylogenetic distance effect from 25 publications  
87 reporting the success or failure of *Wolbachia* transfection experiments is reviewed in  
88 Russell *et al.* (2009).

89 Second, a variety of phylogenetic methods have been used to investigate whether  
90 host-shifts occur preferentially between related host species. Much early work  
91 comparing host and parasite phylogenetic trees focused on reconciling those trees  
92 and identifying the degree of cospeciation. However, Charleston & Robertson (2002)  
93 showed that the observation that closely related lentiviruses tend to infect closely  
94 related primate hosts is best explained not by codivergence but by preferential host-  
95 switching between related hosts (because the viruses only spread relatively recently  
96 on the primate tree). Studies in rabies viruses infecting various bat species  
97 confirmed the presence of the phylogenetic distance effect (Streicker *et al.* 2010)  
98 and further demonstrated that while species range overlap was the best predictor of  
99 spillover events, phylogenetic distance was the best predictor of host-shift events  
100 (Faria *et al.* 2013). Clark & Clegg (2017), studying the distribution of malaria among  
101 south-Melanesian birds found that despite ample opportunity for host-switching due  
102 to vector-borne transmission, similar parasites were restricted to similar hosts. As a  
103 final example, in a study of eukaryotic picophytoplankton and their viruses, Bellec *et*  
104 *al.* (2014) reported high levels of congruence between host and parasite  
105 phylogenetic trees but demonstrated that this is due to preferential host-shifts rather  
106 than cospeciation. Some studies have also provided evidence that *Wolbachia*  
107 endosymbionts switch preferentially between related arthropod host species (Baldo  
108 *et al.* 2008; Russell *et al.* 2009; see also Discussion). In summary, the experimental  
109 and comparative work indicates that although not ubiquitous (e.g., Stahlhut *et al.*  
110 2010; Longdon *et al.* 2015), the phylogenetic distance effect is an important  
111 determinant of host-shifts in many systems.

112 Most of the previous theoretical work on host-shifts has focused on reconciling host  
113 and parasite phylogenetic trees, identifying host-shift vs. cospeciation events, and  
114 inferring parameters underlying these processes (older literature reviewed in de  
115 Vienne *et al.* 2013; newer work includes Baudet *et al.* 2015; Wieseke *et al.* 2015;  
116 Drinkwater & Charleston 2016; Alcalá *et al.* 2017). Mathematically speaking, these  
117 are very hard problems and most of the developed algorithms are computationally  
118 expensive. It is therefore not surprising that the phylogenetic distance effect is  
119 usually not considered in these methods, despite the widely recognised fact that  
120 preferential host switching may be misinterpreted as cospeciation (de Vienne *et al.*  
121 2007). Exceptions include a study where data from RNA virus-mammal associations  
122 were used to test two different models describing the decline in host-shift success  
123 with increasing phylogenetic distance between host species (Cuthill & Charleston  
124 2013), and a study in which the host-shift dynamics of protozoan parasites in new  
125 world monkeys were inferred (Waxman *et al.* 2014). In contrast to the development  
126 of inference methods for host-parasite cospeciation and host-shifts, little work has  
127 been done to explore the consequences of the phylogenetic distance effect for the  
128 dynamics of parasites spread across host species and the expected patterns of  
129 parasite distribution. In simulations of parasite host switching, Engelstädter and  
130 Hurst (2006) demonstrated that the ‘shape’ of a host clade strongly influences  
131 parasite prevalence and distributions within host clades. However, their model (like  
132 the model by de Vienne *et al.* 2007) only considered a few idealised host trees (e.g.,  
133 either completely symmetrical or ladder-like), and they (like Cuthill & Charleston  
134 2013; Waxman *et al.* 2014) assumed that host switching occurred only at the tips of  
135 the trees.

136 Here, we present the results of a stochastic model in which a clade of host species  
137 evolves under a birth-death process and a clade of parasites spreads concurrently  
138 on this host tree through both cospeciation events and host-shifts (either preferential  
139 or random). Through extensive computer simulations we investigate how often the  
140 parasites can invade a naïve host tree, how many hosts will become infected and  
141 how the parasites are distributed across host species. Our model predicts that both  
142 individual host phylogenies and the macroevolutionary processes underlying these  
143 phylogenies have a major influence on host-shift dynamics when the phylogenetic  
144 distance effect is important.

## 145 **Methods**

### 146 *Mathematical model*

147 We considered a stochastic model of host-parasite co-diversification, illustrated in  
148 Figure 1. Host trees emerge from a single ancestor according to a density-  
149 dependent birth-death process. Hosts go extinct at a constant rate  $\mu$  and speciate at  
150 a baseline rate  $\lambda$  that is multiplied by the term  $(1-N/K)$ , resulting in a decreasing  
151 speciation rate as the number of host species  $N$  approaches the carrying capacity  $K$ .  
152 Each parasite species is associated with a single host species. Parasites go extinct  
153 at a constant rate  $\nu$  and always co-speciate whenever their hosts speciate. Host-  
154 shifts represent an alternative, independent mode of parasite speciation in which one  
155 lineage remains associated with the original host and a new lineage arises that is  
156 associated with a new host species. Host-shifts occur at a baseline rate  $\beta S$ , where  $S$   
157 is the number of uninfected host species. New hosts are chosen randomly from all  
158 uninfected hosts but not all host-shifts are successful. Rather, the host-shift rate is

159 multiplied by the probability of successful establishment of the parasite in the new  
160 host species,  $\exp(-\gamma D_{ij})$  (the same relationship but using a different notation was  
161 used by Engelstädter & Hurst 2006; Cuthill & Charleston 2013). Here, the parameter  
162  $\gamma$  determines how fast the establishment probability declines with increasing  
163 phylogenetic distance  $D_{ij}$  between the donor host species  $i$  and the new host species  
164  $j$  (i.e.,  $D_{ij}$  is the total length of branches connecting the two species with their most  
165 recent common ancestor). When  $\gamma=0$ , all host-shifts are successful (no phylogenetic  
166 distance effect) but with larger values of  $\gamma$ , host species that are only distantly related  
167 to the original host are increasingly unlikely to become infected.

#### 168 *Model implementation*

169 We analysed our model using computer simulations. Time proceeds in small steps  
170 ( $\Delta t=10^{-4}$ ) in which the different events (host speciation, host extinction etc.) take  
171 place with probabilities given by their rates multiplied by  $\Delta t$ . Since host evolution is  
172 not affected by the parasites in our model, we first simulated the host trees and then  
173 simulated parasite diversification on those host trees.

174 The routines to simulate the cophylogenetic process were implemented in the  
175 programming language R (R Core Team 2017). We bundled these routines, along  
176 with other functions for simulation, subsequent analyses and plotting of  
177 cophylogenetic trees, into a new R-package named 'cophy'. This package depends  
178 on the following other R-packages: APE v4.1 (Paradis *et al.* 2004), parallel v3.3.2 (R  
179 Core Team 2017), foreach v1.4.3 (Revolution Analytics & Weston 2015b), and  
180 doParallel v1.0.10 (Revolution Analytics & Weston 2015a). We used the R-packages  
181 devtools v1.13.2 (Wickham & Chang 2017) and roxygen2 v6.0.1 (Wickham *et al.*  
182 2017) to generate our package. The cophy package will be made available on CRAN



183 upon publication of this article. For data analysis, we also used lme4 v1.1-12 (Bates  
184 *et al.* 2015).

### 185 *Simulations*

186 We started by simulating different sets of host trees, each containing 100 trees that  
187 were initialised with a single species and evolved for 100 time units. Only trees that  
188 survived this time span were retained. For one standard set of trees that we focused  
189 on initially, we chose a speciation rate of  $\lambda=1$ , an extinction rate of  $\mu=0.5$  and a  
190 carrying capacity of  $K=200$ , yielding an expected equilibrium tree size of  $N=100$   
191 species. Using this set as a baseline, we created three series of similar sets with 1)  
192 the same speciation and extinction rate but with  $N$  increasing from 30 to 200, 2) the  
193 same equilibrium clade size and net diversification rate ( $\lambda-\mu=0.5$ ) but extinction rate  
194  $\mu$  increasing from 0.1 to 0.9, and 3) eight other sets with the same equilibrium clade  
195 size but different net diversification and turnover rates (see Supplementary  
196 Information for details).

197 To simulate parasite diversification on those host trees, we introduced a single  
198 parasite species at time  $t=50$  on a given host tree and simulated until the parasite  
199 went extinct or the present ( $t=100$ ) was reached. For each host tree, we randomly  
200 chose ten branches on which the first parasite species arrived and performed ten  
201 replicate simulations for each of these initial branches. Thus, for each set of host  
202 trees we performed a total of  $100 \times 10 \times 10 = 10,000$  simulations.

203 We focused on two parameter sets for parasite evolution. First, we used a parameter  
204 combination with which the phylogenetic distance effect is present:  $\beta=0.5$ ,  $\gamma=0.06$   
205 and  $\nu=1$ . Second, as a control, we used a parameter combination with which the  
206 phylogenetic distance effect is absent:  $\beta=0.02$ ,  $\gamma=0$  and  $\nu=1$ . We refer to these two

207 standard parameter combinations as the standard PDE and no-PDE parameters,  
208 respectively. The parameters were chosen so that both the probability of parasite  
209 establishment and the observed frequency of infected hosts at the end of the  
210 simulation are roughly the same (around 0.5; see Results). In order to test whether  
211 our results are robust with respect to the choice of parameters, we also performed  
212 simulations with two other PDE / no-PDE parameter combinations that are  
213 characterised by 1) a higher turnover in parasite diversification, and 2) coinfection of  
214 multiple parasites in one host species (see SI for details).

### 215 *Analyses of results*

216 For each simulation we obtained some basic statistics, including the fraction of  
217 simulations in which the parasites established a surviving infection on the host trees,  
218 the distribution of the number of host and parasite species and the frequency of  
219 infected hosts at the end of the simulation (contingent on parasite survival). For  
220 parasite trees that did not leave any surviving species we obtained the time of  
221 extinction and for those which did we obtained the time of the most recent common  
222 ancestor of all extant species. As a simple statistic describing the distribution of  
223 parasites within the host phylogeny we used the correlation coefficient between host  
224 and parasite phylogenetic distances (see SI, section 1.1). We also investigated the  
225 frequency of infected host species within subclades of the host phylogeny (see SI  
226 section 1.2).

## 227 Results

### 228 *Patterns of parasite spread and distributions*

229 We first focused on understanding the host-shift dynamics under the phylogenetic  
230 distance effect on a standard set of host trees simulated under the same birth-death  
231 process. Figure 2 shows the distributions of some summary statistics for these  
232 simulations. The parasites survived in 5398 out of 10,000 simulations. In those  
233 cases, the parasites spread to a mean frequency of 50.3% of infected host species  
234 by the end of the simulations, but with considerable variance (Fig. 2A). Where the  
235 parasites went extinct, this usually occurred very early during the simulations (Fig.  
236 2B). The most recent common ancestor of surviving parasites was often the first  
237 parasite infecting the host tree or one of its early descendants (Fig. 2C). However,  
238 aside from this peak at time 50 (marking the arrival of the first parasite on the host  
239 tree), the distribution in MRCA times is rather flat, indicating that in many simulations  
240 all but one of the early-branching parasite lineages had gone extinct.

241 In Figure 2D, we plot the distribution of correlation coefficients between phylogenetic  
242 distances between pairs of parasite species and the phylogenetic distances between  
243 their associated host species. This distribution shows a strong positive trend: >98%  
244 of simulations where the parasites survived exhibited a positive correlation, with a  
245 median of 0.807. Thus, closely related parasites tend to be found in closely related  
246 host species and *vice versa*. This is not primarily a consequence of co-speciation  
247 events but of the phylogenetic distance effect. In our control simulations assuming  
248 the absence of the phylogenetic distance effect (no-PDE parameter set with  $\gamma=0$ ), the  
249 host-parasite phylogenetic correlation coefficients are distributed around zero (Fig.  
250 S1D). The median of this distribution is still positive (0.021), which is explained by

251 recent co-speciation events, but the distribution is very distinct from the one  
252 observed in the presence of the phylogenetic distance effect.

253 We can also ask how parasites are distributed within different host clades when the  
254 phylogenetic distance effect is important. Parasites will shift predominantly within  
255 host clades but rarely between different clades in this case. One might therefore  
256 expect that all else being equal, larger host clades should on average harbour more  
257 parasites than smaller clades. Figure S3 shows that this expectation is fulfilled both  
258 when the host trees are split into few large and into many smaller clades (Fig. S3A  
259 and B). In the absence of the phylogenetic distance effect, host clade size has no  
260 effect on the fraction of hosts that are infected within those clades (Fig. S3C and D).

#### 261 *Host trees are important in determining parasite spread*

262 Figure 3A shows that in the presence of the phylogenetic distance effect, the  
263 distribution of the fraction of infected host species observed at the end of the  
264 simulations differs according to host tree. A random effects model confirms the visual  
265 impression that much of the variation in the fraction of infected host species  
266 observed at the end of the simulations is due to the specific host tree on which the  
267 parasites spread (see SI, section 2). By contrast, in the absence of the phylogenetic  
268 distance effect, the observed mean infection frequencies are much more  
269 homogeneous across host trees (Figure 3B), and a lower fraction of the variance is  
270 explained by host trees (SI section 2).

271 To obtain some intuition for the importance of host trees in shaping the host-shift  
272 dynamics, consider the three example co-phylogenies shown in Figure S2,  
273 corresponding to host trees number 1, 5 and 25. In the first example (Fig. S2A), most  
274 of the extant host species form one large, relatively recently formed clade of species.

275 A second, smaller clade is still closely related to the first one. This means that for  
276 most host species there is an abundance of closely related host species, which  
277 enables the parasites to readily undergo host switches and thus reach a high  
278 frequency. The second example (Fig. S2B) shows the opposite extreme: the host  
279 tree consists of several clades that are only distantly related to each other. Parasite  
280 spread and survival within those clades is difficult because these clades are small,  
281 and switches between clades are unlikely. Combined, this explains the low infection  
282 frequencies observed on this tree. The third example (Fig. S2C, D) contains a large  
283 clade of closely related host species in which the parasites can thrive. If the  
284 parasites are successful in infecting this large clade, they can reach a high frequency  
285 of infected host species (Fig. S2C). However, this clade is very isolated from the  
286 other clades and connected to the rest of the tree by a long branch. As a  
287 consequence, in many cases the parasites fail to reach this clade and are confined  
288 to the other, much smaller clades (Fig. S2D). As a consequence, we observe a  
289 bimodal distribution of infection frequencies for this tree.

290 To formalise some of the above intuitive explanations for variation in parasite  
291 abundance across host trees, we calculated for each host tree the Shannon index for  
292 the distribution of host species among different host clades (see SI section 1.3). This  
293 Shannon index is greater the more host clades there are and the more evenly  
294 species are distributed among those clades. Figure 4 shows that the Shannon index  
295 is negatively correlated with the fraction of infected host species, indicating that host  
296 trees whose species are clustered in a with few large clades are most conducive to  
297 parasite spread.

298

299 *Robustness to parasite parameters and coinfection*

300 We repeated all simulations with a higher parasite transmission rate ( $\beta=1$ ) and a  
301 higher extinction rate ( $\nu=2$ ). Figures S4 to S7 show that our results are very robust to  
302 this change in parameters. We also re-ran our simulations relaxing the assumption  
303 that no coinfections can occur (SI section 1.1). Again, this did not qualitatively affect  
304 our results (Figures S8 to S11).

305 *Host tree size*

306 We next asked how the equilibrium size of the host trees – determined by the  
307 carrying capacity  $K$  – affects the dynamics of parasite spread. In the absence of the  
308 phylogenetic distance effect, increasing host tree size results in both an increasing  
309 probability of parasite survival and an increasing number of infected hosts at the end  
310 of simulations where parasites do survive (Figure 5). Both of these results are  
311 straightforward in the light of standard epidemiological models with density-  
312 dependent transmission in well-mixed host populations (Keeling & Rohani 2008). In  
313 the presence of the phylogenetic distance effect, there is a much more modest  
314 increase in the parasite survival probability with increasing host tree size, and no  
315 change in the infection frequency. This is because from any given infected host  
316 species, the number of uninfected hosts that can be reached through host-shifts will  
317 generally be limited by the phylogenetic distance effect rather than the total size of  
318 the tree.

319 *Dynamics of host diversification*

320 The results presented above all assumed that host trees evolved under the same  
321 birth-death process, with a speciation rate of  $\lambda=1$  and an extinction rate of  $\mu=0.5$ . In  
322 order to explore the impact of host diversification on parasite spread, we generated

323 sets of host trees with increasing values of  $\lambda$  and  $\mu$  while keeping the difference  $\lambda-\mu$   
324 constant. This means that for all sets of host trees generated, the host trees will  
325 initially grow at the same net diversification rate but when they reach their carrying  
326 capacity, the rate at which new host species are born and go extinct increases (both  
327 occurring at rate  $\mu$ ).

328 Figure 6A shows that in the presence of the phylogenetic distance effect, the host  
329 tree sets generated in this way vary strongly in both the parasite survival probability  
330 and the fraction of infected host species. When host trees evolve with very low  
331 speciation and extinction rates, the parasites almost always become extinct, and if  
332 they survive they reach only a very low infection frequency. This is because  
333 branches are very long in such host trees, resulting in large phylogenetic distances  
334 between host species that are difficult to overcome by the parasites. When  $\lambda$  and  $\mu$   
335 are high, there will be much turnover in host species and genetic distances will  
336 become short so that parasite spread is facilitated, resulting in a high fraction of  
337 simulations where the parasites survive and reach high infection frequencies.

338 In the absence of the phylogenetic distance effect, mean infection frequencies are  
339 not affected by  $\lambda$  and  $\mu$  (Figure 6B). However, the probability of parasite survival  
340 decreases slightly with increasing  $\lambda$  and  $\mu$ . This is because host species numbers  
341 vary more through time with high than with low host speciation and extinction rates  
342 (results not shown), producing correspondingly strong stochastic variation in  
343 infection rates. As a result, when  $\lambda$  and  $\mu$  are high, stochastic parasite extinction is  
344 more likely than when  $\lambda$  and  $\mu$  are low.

345 Finally, we explored whether host net diversification rate ( $\lambda-\mu$ ) or species turnover  
346 ( $\mu/\lambda$ ) had any impact on the dynamics of parasite spread beyond the impact of the

347 rate of speciation and extinction in the steady state discussed above. We generated  
348 eight additional sets of host trees with different combinations of values for  $\lambda-\mu$  and  
349  $\mu/\lambda$  (see SI section 1.4). Under the phylogenetic distance effect, the parasite survival  
350 rate and the fraction of infected hosts increases with both net diversification rate and  
351 host species turnover on these trees (Figure S12A). However, the results are always  
352 very similar with identical host extinction rates, suggesting that early host tree  
353 evolution was not important. In the absence of the phylogenetic distance effect,  
354 different host tree sets only differ mainly in the fraction of simulations where the  
355 parasites survived (Figure S12B), presumably again due to different degrees of  
356 stochastic fluctuations in host tree size.

## 357 **Discussion**

358 Using a mathematical model we have investigated how the phylogenetic distance  
359 effect (preferential host-shifts between closely related species) impacts the  
360 prevalence and distribution of parasites across host species. Our model makes a  
361 number of predictions: all else being equal, 1) host trees in which most species are  
362 found in a few large clades should harbour more parasites than those consisting of  
363 many small clades, 2) host trees characterised by high species turnover (including  
364 rapid adaptive radiations) should harbour more parasites than host trees that are  
365 evolutionarily more inert, and 3) small and isolated clades within trees should  
366 harbour fewer parasites than large clades. These predictions can be tested without  
367 any cophylogenetic analyses and indeed, without any knowledge about phylogenetic  
368 relationships between the parasites. In contrast to previous models where parasites  
369 only switch between extant host species (Engelstädter & Hurst 2006; de Vienne *et*



370 *al.* 2007; Cuthill & Charleston 2013; Waxman *et al.* 2014), in our model parasite and  
371 host diversification occurs concurrently and potentially on similar time scales.

372 The power of our predictions depends on how strong the phylogenetic distance  
373 effect is, both in absolute terms and relative to other effects. The phylogenetic  
374 distance effect emerges from the fact that related species tend to be physiologically  
375 and immunologically similar, thus increasing the chances that a parasite can  
376 successfully replicate in a new host. However, relevant host traits such as the  
377 presence or absence of certain cell surface receptors may also evolve repeatedly  
378 during host diversification. This can give rise to 'clade effects' in which a host clade  
379 that is only distantly related to a donor host may nevertheless have a high propensity  
380 to be recipients of a parasite (Longdon *et al.* 2011; Waxman *et al.* 2014). Moreover,  
381 the probability of host-shifts will depend not only on similarity between host species,  
382 but also on opportunities for parasites from one species to encounter hosts from  
383 another species. This means that both geographical range overlap and ecological  
384 interactions between donor and potential recipient host species may be important  
385 determinants of host-shifts. These factors may obscure the phylogenetic distance  
386 effect.

387 Little is known about the relative importance of (phylo)genetic vs. ecological factors  
388 for host-shifts, but it appears that this varies widely across systems. On the one  
389 hand, several pathogens (e.g., influenza viruses and *Mycobacterium tuberculosis*)  
390 have shifted between humans and domesticated animals such as cattle or fowl –  
391 species that are only distantly related to humans but have close physical contact  
392 (Smith *et al.* 2009; Ren *et al.* 2016). On the other hand, several studies have  
393 reported evidence for a strong phylogenetic distance effect. For example, in

394 microalgae-virus associations in the open sea where no ecological barriers to host-  
395 shifts should exist, there was a clear signal for the phylogenetic distance effect  
396 (Bellec *et al.* 2014). In a study of rabies in bats, host genetic distance was identified  
397 as a key factor for host-shifts whereas ecological factors (range overlap and  
398 similarities in roost structures) had no predictive power (Faria *et al.* 2013).

399 The case of *Wolbachia*, an intracellular bacterium infecting nematodes and  
400 arthropods (Werren *et al.* 2008), indicates that even for a single parasite there may  
401 be considerable variation in the relative importance of different factors affecting host-  
402 shift rates. For example, *Wolbachia* underwent preferential host-shifts to related  
403 species within the spider genus *Agelenopsis* (Baldo *et al.* 2008). By contrast, in  
404 mushroom-associated dipterans ecological similarity (mycophagous vs. non-  
405 mycophagous) appeared to be an important determinant of *Wolbachia* host-shifts  
406 whereas host phylogeny and sympatry did not appear to play a major role (Stahlhut  
407 *et al.* 2010). In bees, neither phylogenetic relatedness between hosts nor ecological  
408 interactions (kleptoparasitism) predicted *Wolbachia* host-shifts (Gerth *et al.* 2013).  
409 Among different orders of arthropods, our prediction that larger clades should have  
410 higher infection levels than smaller clades is not supported in *Wolbachia* (Weinert *et*  
411 *al.* 2015), perhaps indicating that at least at this level the phylogenetic distance effect  
412 is not important. Overall, the *Wolbachia*-arthropod system is characterised by  
413 complex patterns of codiversification that differ between *Wolbachia* strains and host  
414 taxa and that we are only beginning to understand (e.g., Gerth *et al.* 2014; Bailly-  
415 Bechet *et al.* 2017).

416 In order to keep our model as simple as possible we made several assumptions.

417 Most importantly, we assumed that each parasite species is strictly associated with a

418 single host species only. This assumption will be met in parasites that are highly  
419 specialised on their hosts or that are vertically transmitted, so that transmission  
420 between host individuals belonging to different species is very limited. For parasites  
421 infecting multiple hosts, we expect that the phylogenetic distance effect should be  
422 less pronounced and our results therefore less applicable. For parasite speciation,  
423 we assumed barring host-shifts, parasites speciate if and only if their hosts speciate.  
424 Both parasite loss during host speciation and parasite speciation within a host could  
425 be incorporated into our model (which already allows for multiple parasites per host),  
426 but we do not expect this to affect our results qualitatively. Host-shifts were modelled  
427 as density-dependent transmission events, i.e. the more host species there are  
428 within the host phylogeny, the greater the rate of host-shifts for a parasite. Given that  
429 tree size was roughly constant and not affected by the parasites in our model, we  
430 again believe that the assumption of density-dependent (as opposed to frequency-  
431 dependent) transmission is not crucial to our results. Finally, we assumed an  
432 exponential decline in host-shift rates with increasing phylogenetic distance between  
433 hosts. This is arguably the simplest function one can assume for this relationship. A  
434 sigmoidal relationship has also been proposed (Engelstädter & Hurst 2006) and in a  
435 study of RNA viruses in mammals was found to explain the data better than the  
436 exponential function (Cuthill & Charleston 2013), but it remains to be seen how  
437 general this result is.

438 In conclusion, we have developed a model of host-parasite codiversification that  
439 should be most suitable for parasites that are host-specific and undergo preferential  
440 host-shifts according to the phylogenetic distance effect. Our model provides a novel  
441 framework to understand host-shift dynamics across large numbers of host species

442 and over long evolutionary time periods. This framework has enabled the generation  
443 of several testable predictions regarding the distribution and frequency of parasites,  
444 highlighting the importance of host phylogeny in shaping the process of  
445 codiversification.

446

## 447 **Acknowledgments**

448 We thank Sylvain Charlat, Ben Longdon, Daniel Ortiz-Barrientos and Tanja Stadler  
449 for helpful discussions and Sylvain Charlat and Ben Longdon also for insightful  
450 comments on our manuscript. NF acknowledges funding from an Australian  
451 Postgraduate Award and a Global Change Scholars Award from The University of  
452 Queensland.

453

## 454 **References**

455 1.

456 Alcalá, N., Jenkins, T., Christe, P. & Vuilleumier, S. (2017). Host shift and  
457 cospeciation rate estimation from co-phylogenies. *Ecol Lett*, 20, 1014-1024.

458 2.

459 Bailly-Bechet, M., Martins-Simoes, P., Szollosi, G.J., Mialdea, G., Sagot, M.F. &  
460 Charlat, S. (2017). How Long Does Wolbachia Remain on Board? *Mol Biol Evol*,  
461 34, 1183-1193.

462 3.

463 Baldo, L., Ayoub, N.A., Hayashi, C.Y., Russell, J.A., Stahlhut, J.K. & Werren, J.H.  
464 (2008). Insight into the routes of *Wolbachia* invasion: high levels of horizontal  
465 transfer in the spider genus *Agelenopsis* revealed by *Wolbachia* strain and  
466 mitochondrial DNA diversity. *Mol. Ecol.*, 17, 557-569.

467 4.

468 Bates, D., Mächler, M., Bolker, B. & Walker, S. (2015). Fitting Linear Mixed-Effect  
469 Models Using lme4. *Journal of Statistical Software*, 67, 1-48.

470 5.

471 Baudet, C., Donati, B., Sinimeri, B., Crescenzi, P., Gautier, C., Matias, C. *et al.*  
472 (2015). Cophylogeny reconstruction via an approximate Bayesian computation.  
473 *Syst Biol*, 64, 416-431.

474 6.

475 Bellec, L., Clerissi, C., Edern, R., Foulon, E., Simon, N., Grimsley, N. *et al.* (2014).  
476 Cophylogenetic interactions between marine viruses and eukaryotic  
477 picophytoplankton. *BMC Evol Biol*, 14, 59.

478 7.

479 Charleston, M.A. & Robertson, D.L. (2002). Preferential Host Switching by Primate  
480 Lentiviruses Can Account for Phylogenetic Similarity with the Primate Phylogeny.  
481 *Syst. Biol.*, 51 528-535.

482 8.

483 Choi, Y.J. & Thines, M. (2015). Host Jumps and Radiation, Not Co-Divergence  
484 Drives Diversification of Obligate Pathogens. A Case Study in Downy Mildews and  
485 Asteraceae. *PLoS One*, 10, e0133655.

486 9.

487 Clark, N.J. & Clegg, S.M. (2017). Integrating phylogenetic and ecological distances  
488 reveals new insights into parasite host specificity. *Mol Ecol*, 26, 3074-3086.

489 10.

490 Clayton, D.H., Bush, S.E., Goates, B.M. & Johnson, K.P. (2003). Host defense  
491 reinforces host-parasite cospeciation. *PNAS*, 100, 15694-15699.

492 11.

493 Crook, M. (2014). The dauer hypothesis and the evolution of parasitism: 20 years on  
494 and still going strong. *Int J Parasitol*, 44, 1-8.

495 12.

496 Cuthill, J.H. & Charleston, M.A. (2013). A Simple Model Explains the Dynamics of  
497 Preferential Host Switching among Mammal Rna Viruses. *Evolution*, 67, 980-990.

498 13.

499 de Vienne, D.M., Giraud, T. & Shykoff, J.A. (2007). When can host shifts produce  
500 congruent host and parasite phylogenies? A simulation approach. *J. Evol. Biol.*,  
501 20, 1428-1438.

502 14.

503 de Vienne, D.M., Hood, M.E. & Giraud, T. (2009). Phylogenetic determinants of  
504 potential host shifts in fungal pathogens. *J Evol Biol*, 22, 2532-2541.

505 15.

506 de Vienne, D.M., Refregier, G., Lopez-Villavicencio, M., Tellier, A., Hood, M.E. &  
507 Giraud, T. (2013). Cospeciation vs host-shift speciation: methods for testing,  
508 evidence from natural associations and relation to coevolution. *The New*  
509 *phytologist*, 198, 347-385.

510 16.

511 Drinkwater, B. & Charleston, M.A. (2016). Towards sub-quadratic time and space  
512 complexity solutions for the dated tree reconciliation problem. *Algorithms Mol Biol*,  
513 11, 15.

514 17.

515 Engelstädter, J. & Hurst, G.D.D. (2006). The dynamics of parasite incidence across  
516 host species. *Evol. Ecol.*, 20, 603-616.

517 18.

518 Faria, N.R., Suchard, M.A., Rambaut, A., Streicker, D.G. & Lemey, P. (2013).  
519 Simultaneously reconstructing viral cross-species transmission history and  
520 identifying the underlying constraints. *Philosophical transactions of the Royal*  
521 *Society of London. Series B, Biological sciences*, 368, 20120196.

522 19.

523 Gerth, M., Gansauge, M.T., Weigert, A. & Bleidorn, C. (2014). Phylogenomic  
524 analyses uncover origin and spread of the Wolbachia pandemic. *Nat Commun*, 5,  
525 5117.

526 20.

527 Gerth, M., Rothe, J. & Bleidorn, C. (2013). Tracing horizontal Wolbachia movements  
528 among bees (Anthophila): a combined approach using multilocus sequence typing  
529 data and host phylogeny. *Mol Ecol*, 22, 6149-6162.

530 21.

531 Gilbert, G.S. & Webb, C.O. (2007). Phylogenetic signal in plant pathogen-host range.  
532 *Proc Natl Acad Sci U S A*, 104, 4979-4983.

533 22.

534 Hurst, C.J. (2016). *The Rasputin effect : when commensals and symbionts become*  
535 *parasitic*. Springer.

536 23.

537 Keeling, M.J. & Rohani, P. (2008). *Modeling infectious diseases in humans and*  
538 *animals*. Princeton University Press, Princeton.

539 24.

540 Longdon, B., Brockhurst, M.A., Russell, C.A., Welch, J.J. & Jiggins, F.M. (2014). The  
541 evolution and genetics of virus host shifts. *PLoS Pathog*, 10, e1004395.

542 25.

543 Longdon, B., Hadfield, J.D., Day, J.P., Smith, S.C., McGonigle, J.E., Cogni, R. *et al.*  
544 (2015). The causes and consequences of changes in virulence following pathogen  
545 host shifts. *PLoS Pathog*, 11, e1004728.

546 26.

547 Longdon, B., Hadfield, J.D., Webster, C.L., Obbard, D.J. & Jiggins, F.M. (2011). Host  
548 phylogeny determines viral persistence and replication in novel hosts. *PLoS*  
549 *Pathog*, 7, e1002260.



550 27.

551 Paradis, E., Claude, J. & Strimmer, K. (2004). APE: analyses of phylogenetics and  
552 evolution in R language. *Bioinformatics*, 20, 289-290.

553 28.

554 Perlman, S.J. & Jaenike, J. (2003). Infection success in novel hosts: an experimental  
555 and phylogenetic study of *Drosophila* -parasitic nematodes. *Evolution*, 57, 544-  
556 557.

557 29.

558 R Core Team (2017). R: A language and environment for statistical computing. R  
559 Foundation for Statistical Computing, Vienna, Austria. URL [https://www.r-](https://www.r-project.org/)  
560 [project.org/](https://www.r-project.org/).

561 30.

562 Ren, H., Jin, Y., Hu, M., Zhou, J., Song, T., Huang, Z. *et al.* (2016). Ecological  
563 dynamics of influenza A viruses: cross-species transmission and global migration.  
564 *Scientific reports*, 6, 36839.

565 31.

566 Revolution Analytics & Weston, S. (2015a). doParallel: Foreach Parallel Adaptor for  
567 the 'parallel' Package. R package version 1.0.10. [https://cran.r-](https://cran.r-project.org/package=doParallel)  
568 [project.org/package=doParallel](https://cran.r-project.org/package=doParallel).

569 32.

570 Revolution Analytics & Weston, S. (2015b). foreach: Provides Foreach Looping  
571 Construct for R. R package version 1.4.3. [https://cran.r-](https://cran.r-project.org/package=foreach)  
572 [project.org/package=foreach](https://cran.r-project.org/package=foreach).

573 33.

574 Ricklefs, R.E., Outlaw, D.C., Svensson-Coelho, M., Medeiros, M.C., Ellis, V.A. &  
575 Latta, S. (2014). Species formation by host shifting in avian malaria parasites.  
576 *Proc Natl Acad Sci U S A*, 111, 14816-14821.

577 34.

578 Russell, J.A., Goldman-Huertas, B., Moreau, C.S., Baldo, L., Stahlhut, J.K., Werren,  
579 J.H. *et al.* (2009). Specialization and Geographic Isolation among Wolbachia  
580 Symbionts from Ants and Lycaenid Butterflies. *Evolution*, 63, 624-640.

581 35.

582 Sharp, P.M., Bailes, E., Gao, F., Beer, B.E., Hirsch, V.M. & Hahn, B.H. (2000).  
583 Origins and evolution of AIDS viruses: estimating the time-scale. *Biochem Soc*  
584 *Trans*, 28, 275-282.

585 36.

586 Smith, N.H., Hewinson, R.G., Kremer, K., Brosch, R. & Gordon, S.V. (2009). Myths  
587 and misconceptions: the origin and evolution of Mycobacterium tuberculosis.  
588 *Nature reviews. Microbiology*, 7, 537-544.

589 37.

590 Stahlhut, J.K., Desjardins, C.A., Clark, M.E., Baldo, L., Russell, J.A., Werren, J.H. *et*  
591 *al.* (2010). The mushroom habitat as an ecological arena for global exchange of  
592 Wolbachia. *Mol. Ecol.*, 19, 1940-1952.

593 38.

594 Streicker, D.G., Turmelle, A.S., Vonhof, M.J., Kuzmin, I.V., McCracken, G.F. &  
595 Rupprecht, C.E. (2010). Host phylogeny constrains cross-species emergence and  
596 establishment of rabies virus in bats. *Science*, 329, 676-679.

597 39.

- 598 Taylor, L.H., Latham, S.M. & Woolhouse, M.E.J. (2001). Risk factors for human  
599 disease emergence. *Philos. Trans. R. Soc. Lond., Ser. B: Biol. Sci.*, 356, 983-989.  
600 40.
- 601 Tinsley, M.C. & Majerus, M.E.N. (2007). Small steps or giant leaps for male-killers?  
602 Phylogenetic constraints to male-killer host shifts. *Bmc Evolutionary Biology*, 7.  
603 41.
- 604 Waxman, D., Weinert, L.A. & Welch, J.J. (2014). Inferring host range dynamics from  
605 comparative data: the protozoan parasites of new world monkeys. *The American  
606 naturalist*, 184, 65-74.  
607 42.
- 608 Weinert, L.A., Araujo-Jnr, E.V., Ahmed, M.Z. & Welch, J.J. (2015). The incidence of  
609 bacterial endosymbionts in terrestrial arthropods. *Proceedings. Biological  
610 sciences / The Royal Society*, 282, 20150249.  
611 43.
- 612 Werren, J.H., Baldo, L. & Clark, M.E. (2008). *Wolbachia*: master manipulators of  
613 invertebrate biology. *Nat. Rev. Microbiol.*, 6, 741-751.  
614 44.
- 615 Werren, J.H., Zhang, W. & Guo, L.R. (1995). Evolution and phylogeny of *Wolbachia*:  
616 Reproductive parasites of arthropods. *Proc. R. Soc. Lond. B*, 261, 55-63.  
617 45.
- 618 Wickham, H. & Chang, W. (2017). devtools: Tools to Make Developing R Packages  
619 Easier.  
620 46.

621 Wickham, H., Danenberg, P. & Eugster, M. (2017). roxygen2: In-Line Documentation  
622 for R.  
623 47.

624 Wieseke, N., Hartmann, T., Bernt, M. & Middendorf, M. (2015). Cophylogenetic  
625 Reconciliation with ILP. *Ieee Acm T Comput Bi*, 12, 1227-1235.  
626 48.

627 Wolfe, N.D., Dunavan, C.P. & Diamond, J. (2007). Origins of major human infectious  
628 diseases. *Nature*, 447, 279-283.  
629 49.

630 Wood, J.L., Leach, M., Waldman, L., Macgregor, H., Fooks, A.R., Jones, K.E. *et al.*  
631 (2012). A framework for the study of zoonotic disease emergence and its drivers:  
632 spillover of bat pathogens as a case study. *Philosophical transactions of the Royal*  
633 *Society of London. Series B, Biological sciences*, 367, 2881-2892.  
634  
635

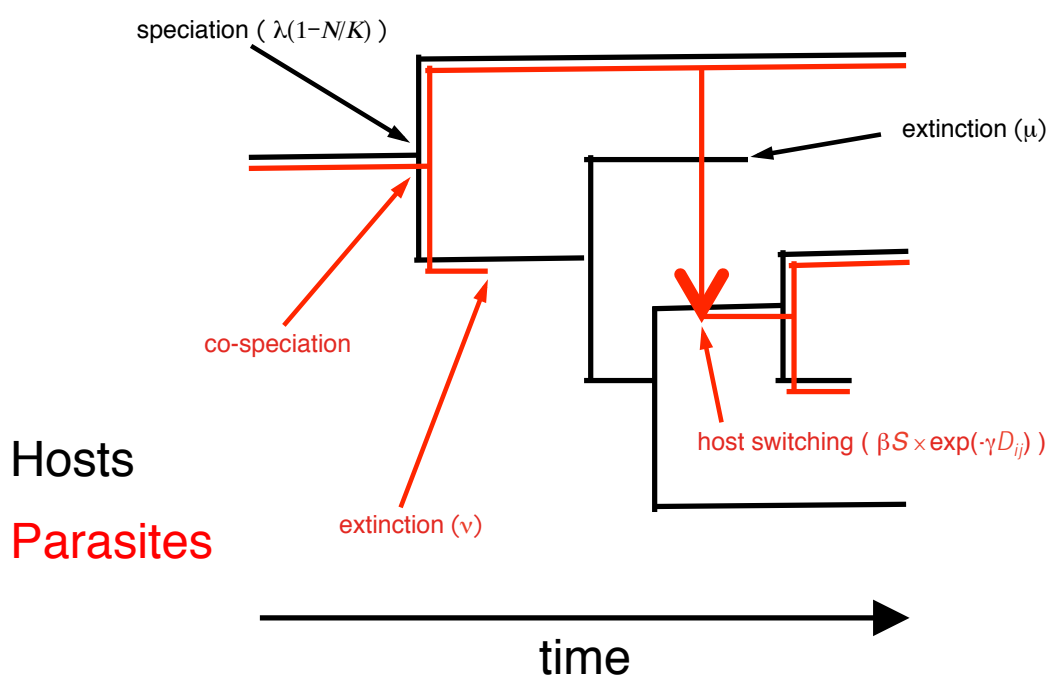

636

637 Figure 1. Illustration of the model; see Methods section for details.

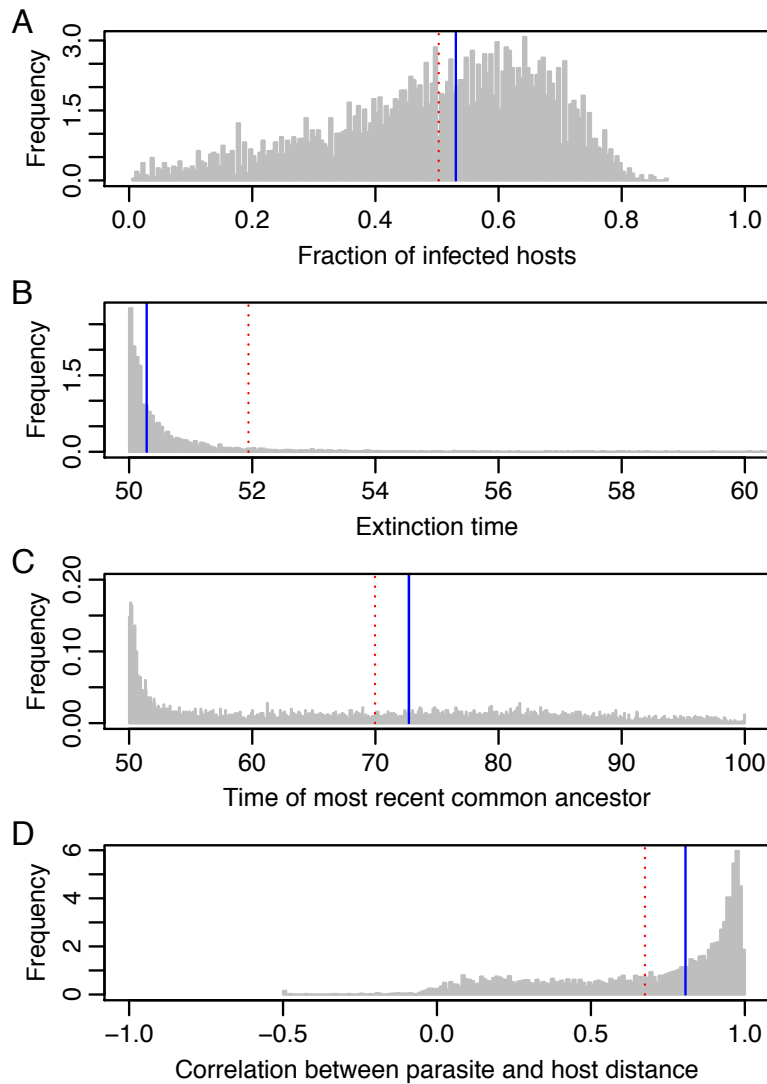

638

639 Figure 2. Summary statistics for simulations in the presence of the phylogenetic  
640 distance effect and with the standard host tree set and PDE parameter set. Panel (A)  
641 shows the distribution of the fraction of infected host species across the 10,000  
642 simulations, contingent on parasite survival. Panel (B) shows the distribution of  
643 parasite extinction times when the parasite did not survive following its introduction  
644 at time 50. Panel (C) shows the distribution of the time of the most recent common  
645 ancestor of all surviving parasite species (where time=100 is the present). In panel  
646 (D), the distribution of the correlation between parasite and host phylogenetic  
647 distances is shown. In all plots, the solid blue line indicates the median and the  
648 dashed red line the mean of the distributions.

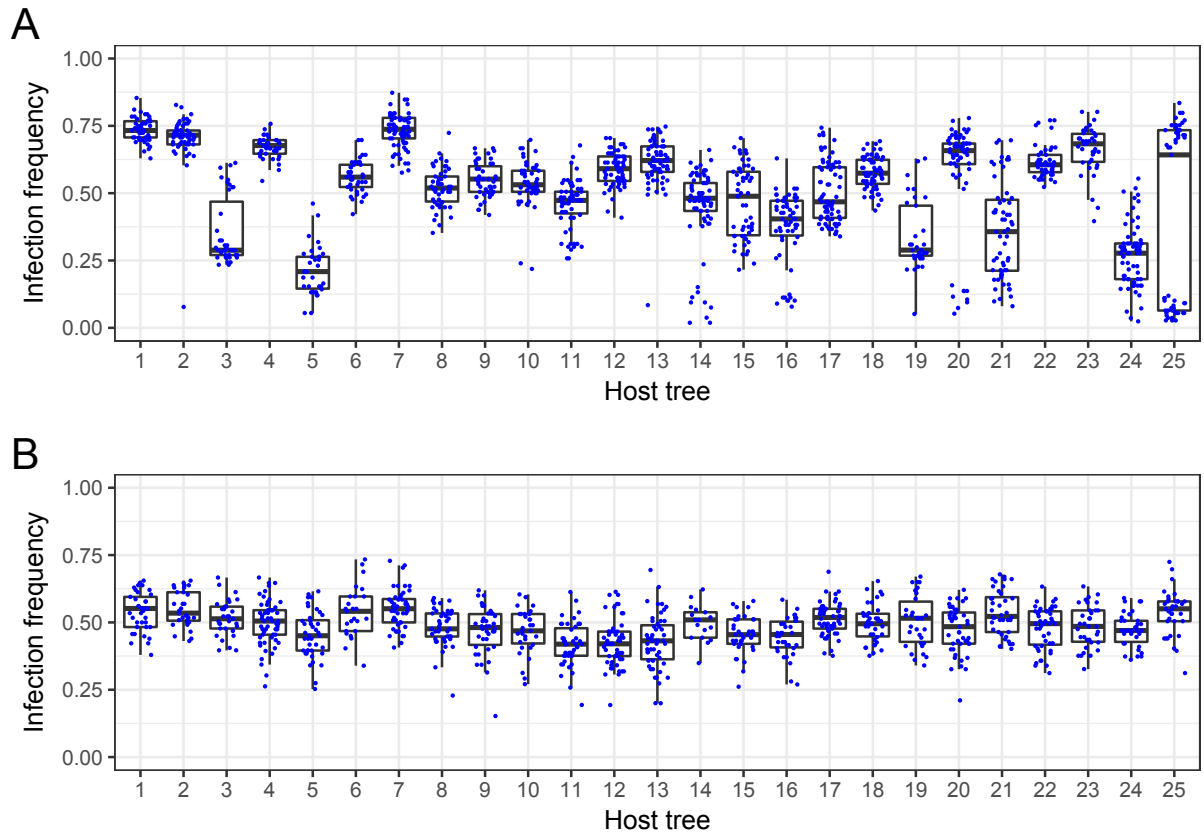

649

650 Figure 3. Distributions of infection frequencies with (A) and without (B) the  
651 phylogenetic distance effect on the first 25 host trees. Each dot shows the fraction of  
652 infected host species at the end of a simulation run. Simulations in which the  
653 parasites did not survive until the end of the simulation are not shown. Boxes show  
654 the interquartile range with the horizontal line indicating the median and whiskers  
655 indicating the distance from the box to the largest value no further than 1.5 times the  
656 interquartile range. All parameters take the standard values.

657

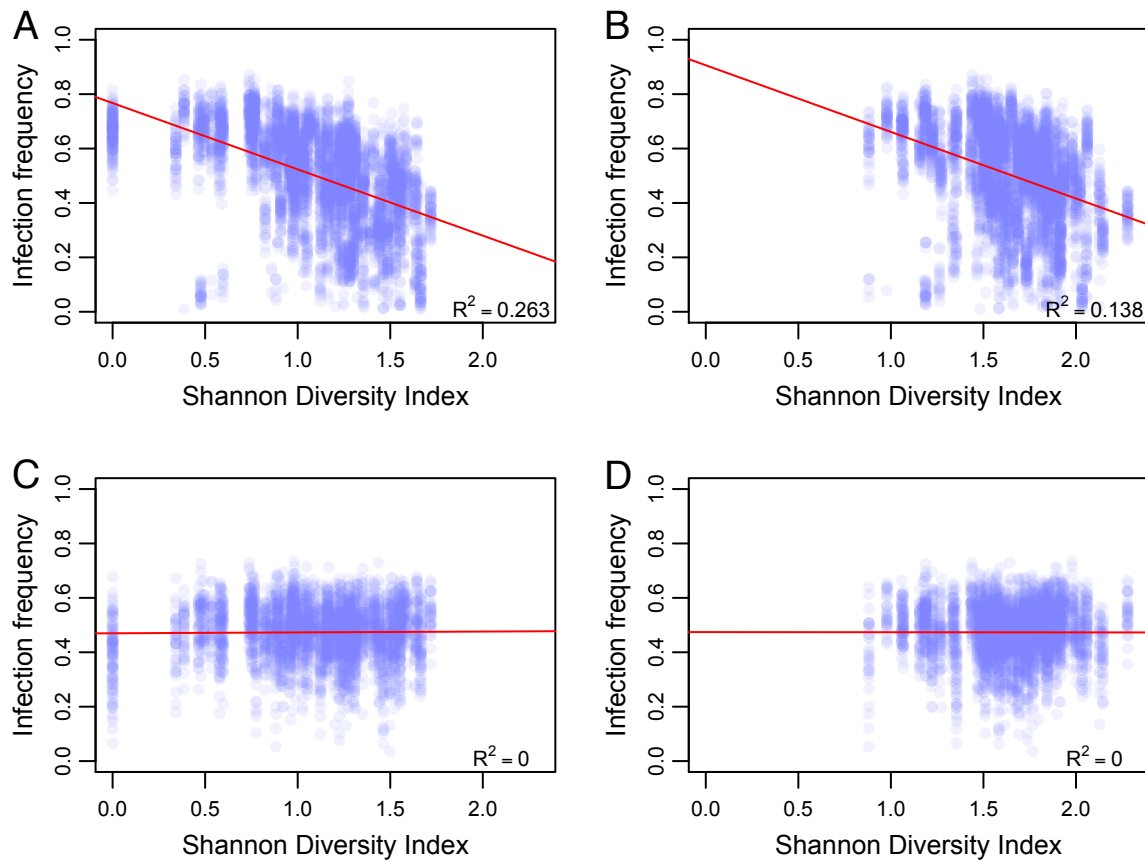

658

659 Figure 4. Fraction of infected hosts at the end of simulations against the Shannon  
660 index of host species distribution within the respective host tree, with (A,B) or without  
661 (C,D) the phylogenetic distance effect. Each dot represents the outcome of a single  
662 simulation; simulations in which the parasites became extinct were discarded.  
663 Partitioning of host trees into subtrees (or clades) and calculating the Shannon index  
664 was performed as described in SI section 1.3, with the height parameter set to either  
665 100 (plots A and C, corresponding to few large subtrees) or 50 (plots B and D,  
666 corresponding to more but smaller subtrees). Red lines show the fit of a linear  
667 regression with  $R^2$  values indicated. All parameters take standard values.

668



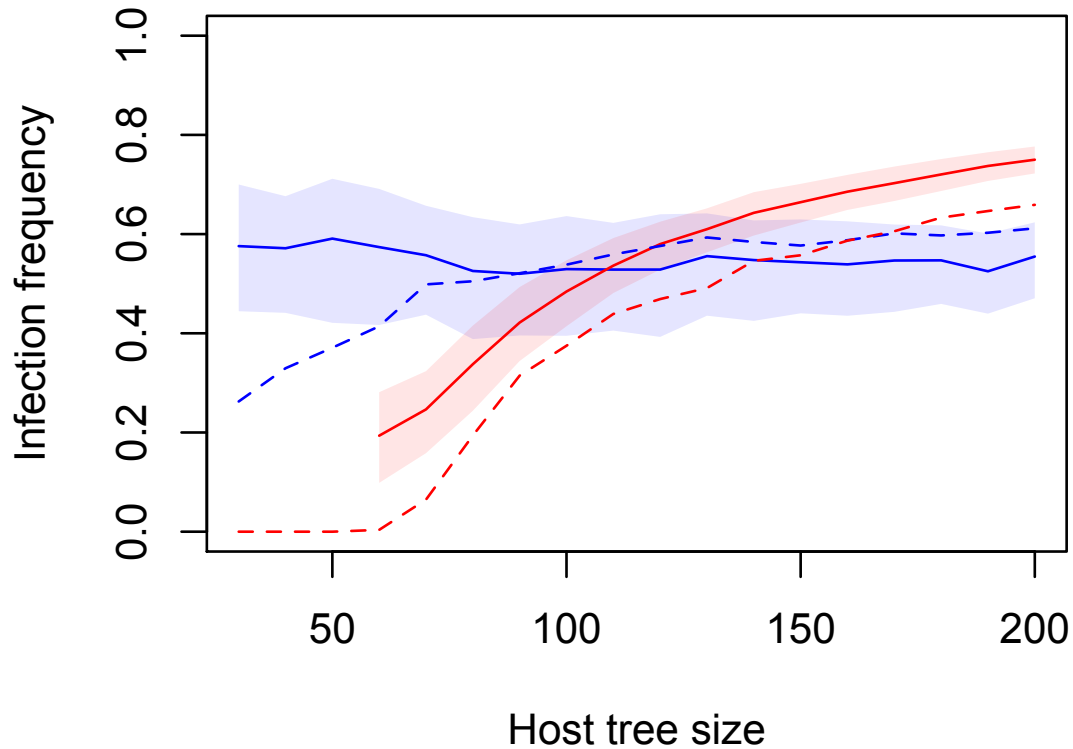

669

670 Figure 5. Influence of the equilibrium host tree size on parasite survival rates and  
671 infection frequencies in presence (blue) and absence (red) of the phylogenetic  
672 distance effect. Dashed lines show the fraction of simulations in which the parasites  
673 invaded the host tree and survived until the end of the simulations. Solid lines show  
674 the median fraction of infected host species at the end of the simulations for those  
675 simulations in which the parasites survived, with shadings indicating the interquartile  
676 range. Equilibrium host tree size was modified by varying the carrying capacity  
677 parameter  $K$  over a range of values from 30 to 280. All other parameters take  
678 standard values.

679

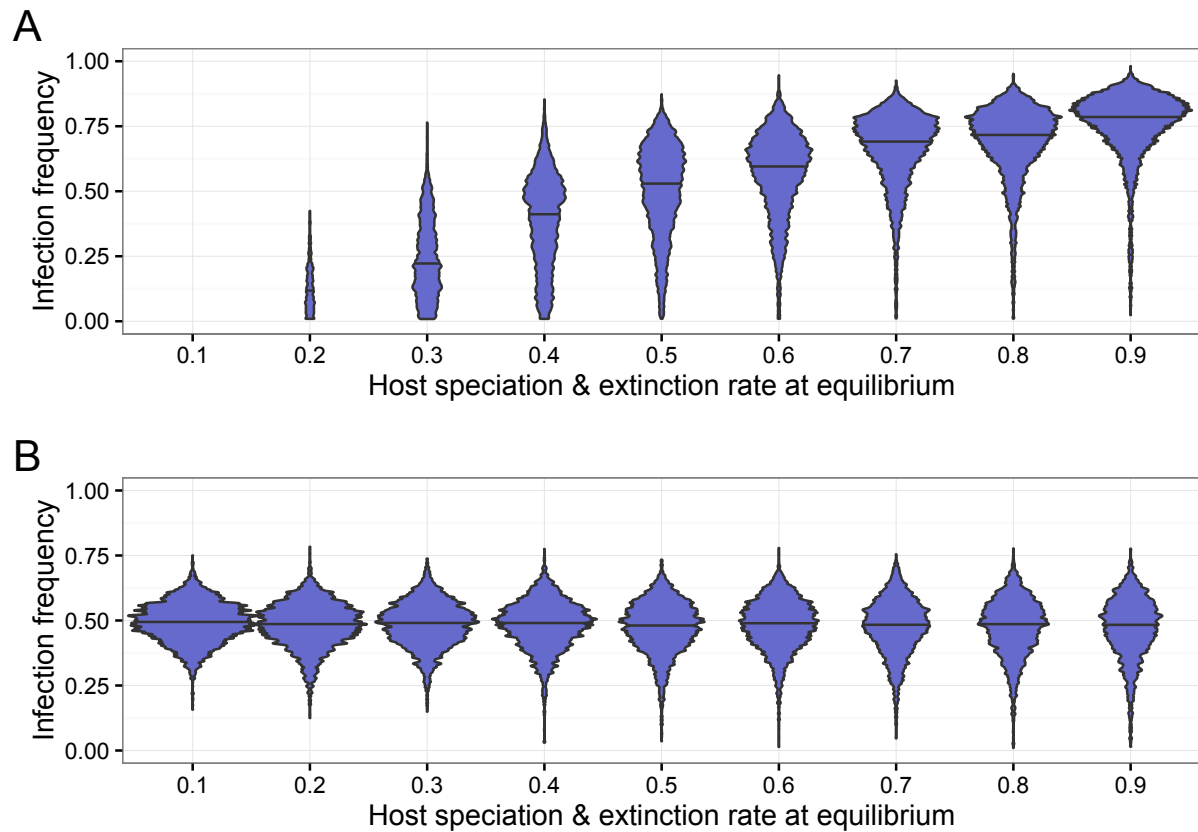

680

681 Figure 6. The impact of host speciation and extinction rate at equilibrium on the  
682 fraction of infected host species with (A) and without (B) the phylogenetic distance  
683 effect. Violins show the distribution of infection frequencies, with the total area of  
684 each violin being proportional to the number of simulations where the parasites  
685 survived. Equilibrium speciation and extinction rates were varied by using host  
686 extinction rates  $\mu$  ranging from 0.1 to 0.9. At the same time, we varied the host  
687 speciation rate  $\lambda$  from 0.6 to 1.4 in order to maintain a constant net diversification  
688 rate of  $\lambda - \mu = 0.5$  during the early stages of host evolution. Parasite parameters take  
689 standard PDE and no-PDE values.

690
